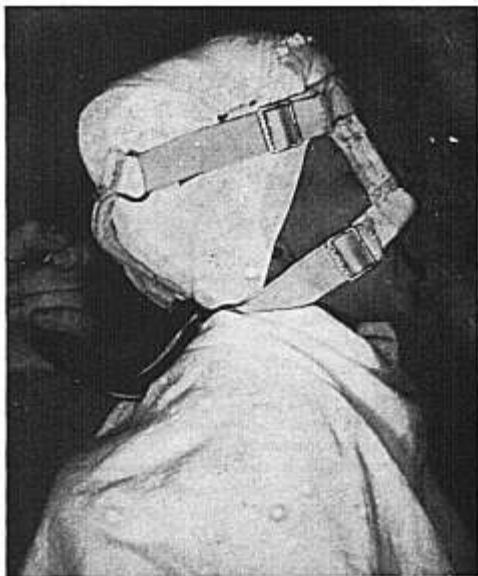

FIG. 4. Side view, showing extension of head.

sponge rubber. Control of the head is effected by ordinary suitcase handles, easily held by one hand. The strap is quickly and easily constructed, and allows the anesthesiologist a free hand for controlling the

anesthesia equipment and maintaining the airway.

MELVIN S. KAPLAN, M.D.,  
Massachusetts Memorial Hospitals  
Boston, Massachusetts

### CORRESPONDENCE

*To the Editor:*

I am referring to the article on "Nomenclature for Methods of Inhalation Anesthesia" by Moyers which appeared in the November 1953 issue, it is assumed, with editorial approval.

I agree emphatically with Moyers on the necessity of clearing up the confusion of nomenclature, but it seems to me that Moyers adds to the confusion rather than attempting to clarify it.

"Semi" is a Greek prefix, meaning half. The half empty glass is as full as the half full one, or the half full one is just as empty as the half empty one.

Therefore, I believe it is necessary that Moyers find other words to describe his techniques which he terms "half open" or "semiopen," and "half closed" or "semiclosed."

Such terms should be defined with editorial approval once and for all. This is the only way that we instructors will know what to teach our apprentices and what to expect in the different examinations.

HELENE D. MAYER, M.D.,  
Director, Department of Anesthesiology,  
Harlem Hospital,  
New York, New York
